# Supplementary material for: An FGF15/19-TFEB regulatory loop controls hepatic cholesterol and bile acid homeostasis
Source: PubMed Central journal article supplement (PMC7368063; doi:10.1038/s41467-020-17363-6), 2020-07-17
Supplement: 41467_2020_17363_MOESM1_ESM.pdf [file 41467_2020_17363_MOESM1_ESM.pdf]

## **An FGF15/19-TFEB regulatory loop controls hepatic cholesterol and bile acid homeostasis**

Wang et al.

This file contains:

- Supplemental Figures 1-11
- Supplemental Table 1. Real-time PCR primer sequences

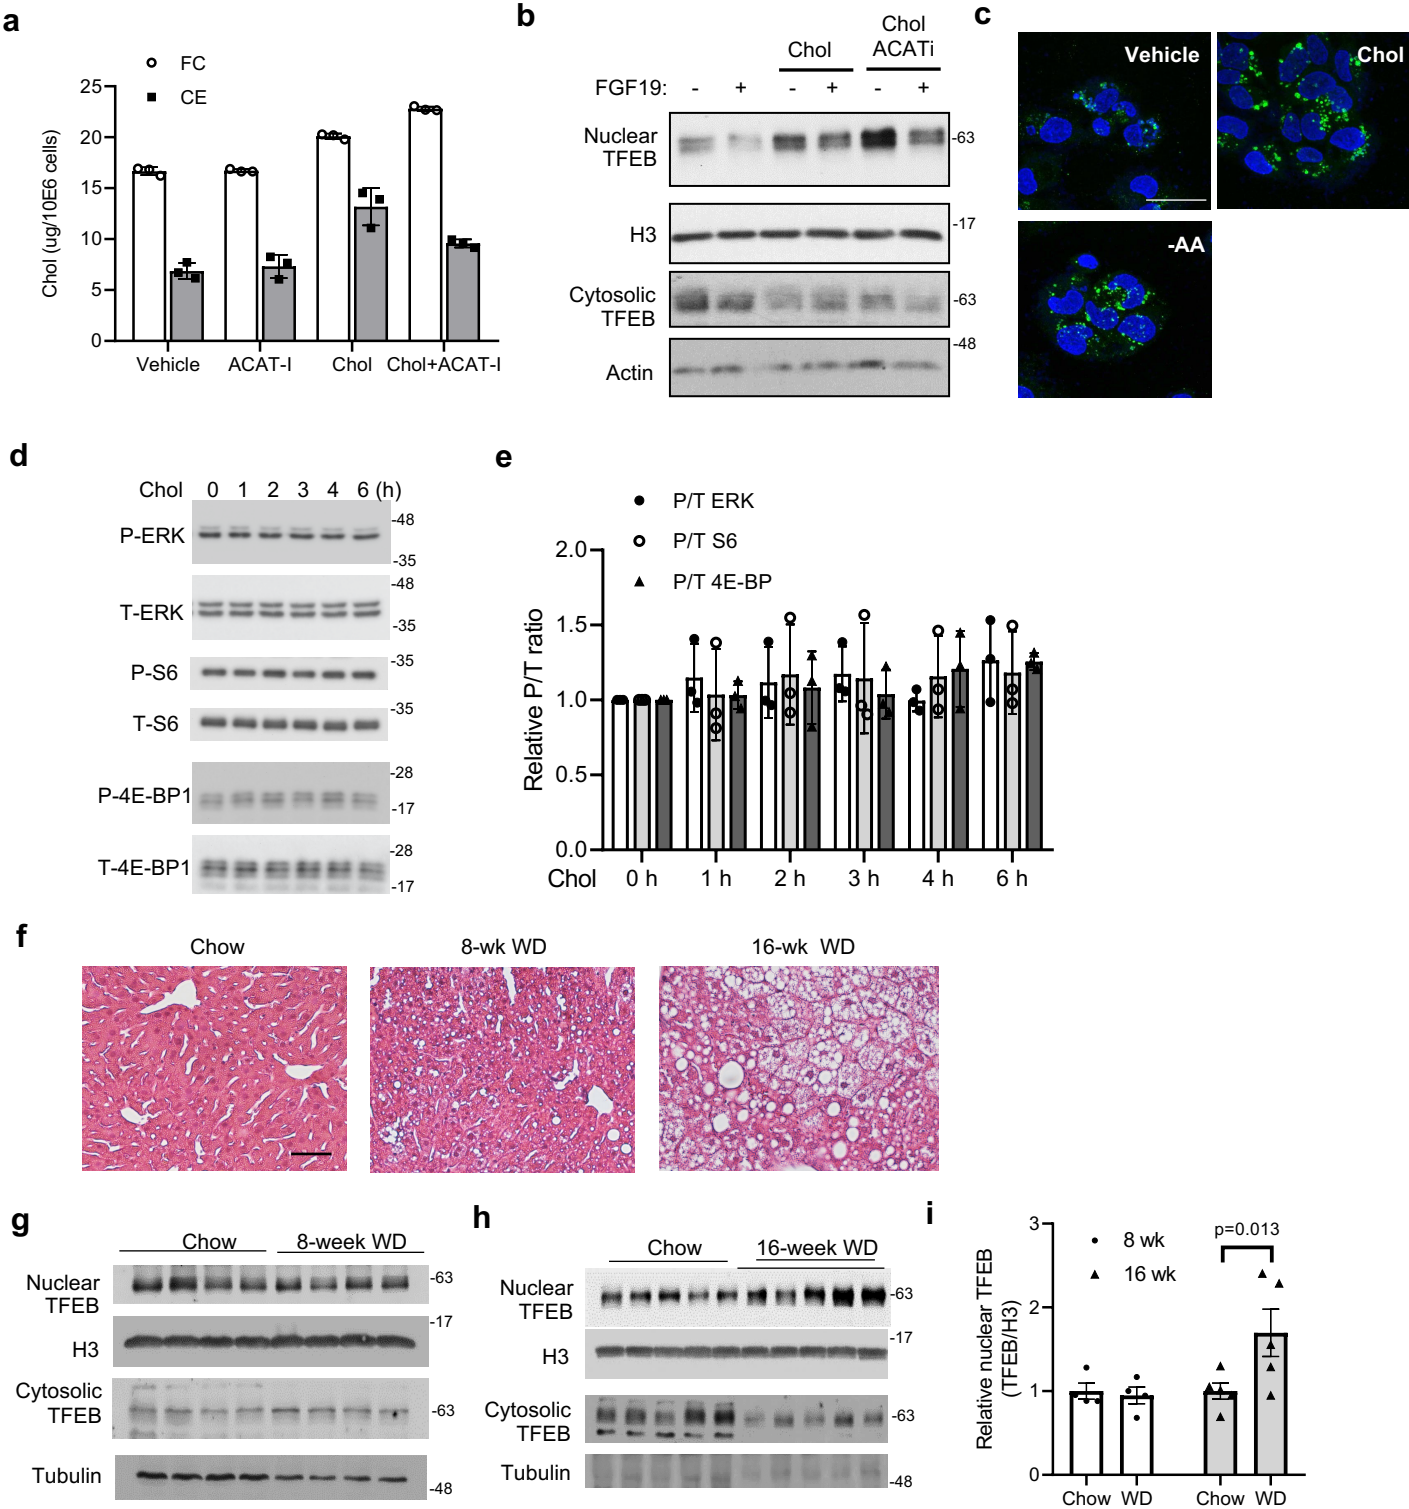

**Supplemental Figure 1. Cholesterol promotes TFEB nuclear translocation.** **a.** HepG2 cells were treated with 25  $\mu\text{g/ml}$  cholesterol and 12.5  $\mu\text{g/ml}$  ACAT inhibitor SANDOZ 58-035 (ACATi) for 16 h. FC: free cholesterol. CE: Cholesterol ester. Results were mean  $\pm$  SD of technical triplicates. **b.** Nuclear and cytosolic TFEB protein. HepG2 cells were treated with 50 ng/ml FGF19 for 30 min followed by 25  $\mu\text{g/ml}$  cholesterol and 12.5  $\mu\text{g/ml}$  ACAT inhibitor SANDOZ 58-035 (ACATi) for 6 h. Representative images of 3 independent experiments with similar results. **c.** HepG2 cells were treated with 25  $\mu\text{g/ml}$  cholesterol for 8 h or cultured in amino acid free EBSS culture medium for 3 h. Immunostaining was performed with anti-Lamp1 antibody. Nuclei were stained with DAPI. Confocal microscope was used to acquire images. Scale bar: 25  $\mu\text{m}$ . Images are representative of 4 independent experiments. **d-e.** HepG2 cells were treated with 25  $\mu\text{g/ml}$  cholesterol in time course. Phosphorylated and total ERK, S6 and 4E-BP1 were measured. Mean phosphorylated (P)/total (T) protein ratio of 3 independent experiments were expressed as mean  $\pm$  SD. **f-i.** Nuclear and cytosolic TFEB in the liver of male C57BL/6J mice fed Western diet for 8 weeks or 16 weeks. Representative images of liver H&E staining of 5 mice/group are shown in "f". Scale bar: 50  $\mu\text{m}$ . Relative nuclear TFEB band densitometry of "g" and "h" are shown in "i" as mean  $\pm$  SEM,  $n=4$  mice/group for "g" and  $n=5$  mice/group for "h". Two-sided Student's t-test was used for "e, i". Source data for a, b, c, d, e, g, h, and i are provided as a Source Data file.



**a**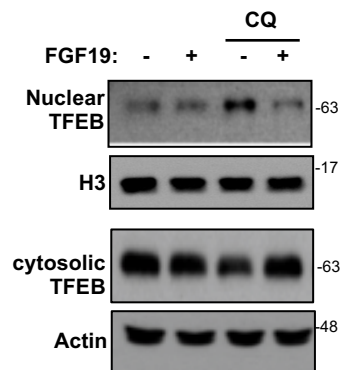**b**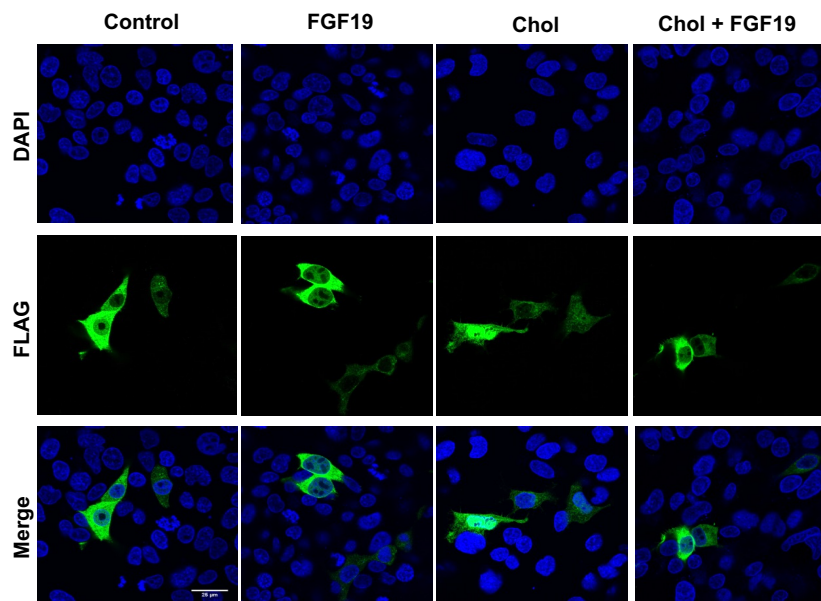

**Supplemental Figure 2. FGF19 inhibits TFEB nuclear translocation.** **a.** Nuclear and cytosolic TFEB protein. HepG2 cells were treated with 50 ng/ml FGF19 for 30 min followed by chloroquine (CQ, 50  $\mu$ M) for 6 h. Images are representative of 2 independent experiments with similar results. **b.** Expanded version of Fig 3f. TFEB-FLAG expression plasmids were transfected in HepG2 cells. Cells were treated with 50 ng/ml FGF19 for 30 min followed by 25  $\mu$ g/ml cholesterol treatment for 6 h. Immunostaining was performed with anti-FLAG antibody. Nuclei were stained with DAPI. Representative images of 3 independent experiments with similar results are shown. Scale bar: 25  $\mu$ m. Source data for "a" is provided as a Source Data file.

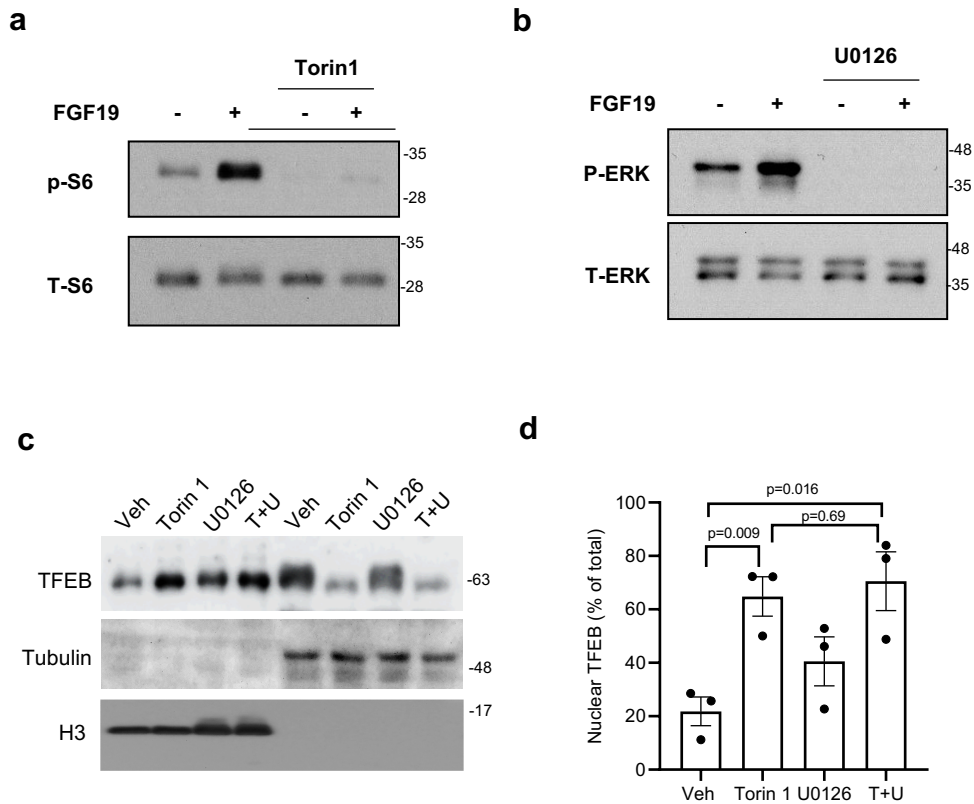

**Supplemental Figure 3. Blocking mTOR and ERK signaling increased TFEB nuclear localization in HepG2 cells.** **a-b.** Overnight serum starved HepG2 cells were treated with 250 nM Torin1, 10  $\mu$ M U0126 and 50 ng/ml FGF19 as indicated for 6 h. Effect on ERK1/2 phosphorylation and mTOR target S6 phosphorylation were measured by Western Blotting. Representative images of 3 independent experiments with similar results. **c-d.** HepG2 cells were treated with 250 nM Torin 1 (T) and/or 10  $\mu$ M U0126 (U) as indicated for 6 h. **c.** A representative blot of nuclear and cytosolic TFEB protein of 3 independent experiments. H3: histone 3. **d.** Nuclear TFEB as % of total TFEB (nuclear + cytosolic TFEB) was calculated based on densitometry. Mean  $\pm$  SD of 3 independent experiments was shown. Two-sided Student's t-test was used for "d". Source data for a-d are provided as a Source Data file.

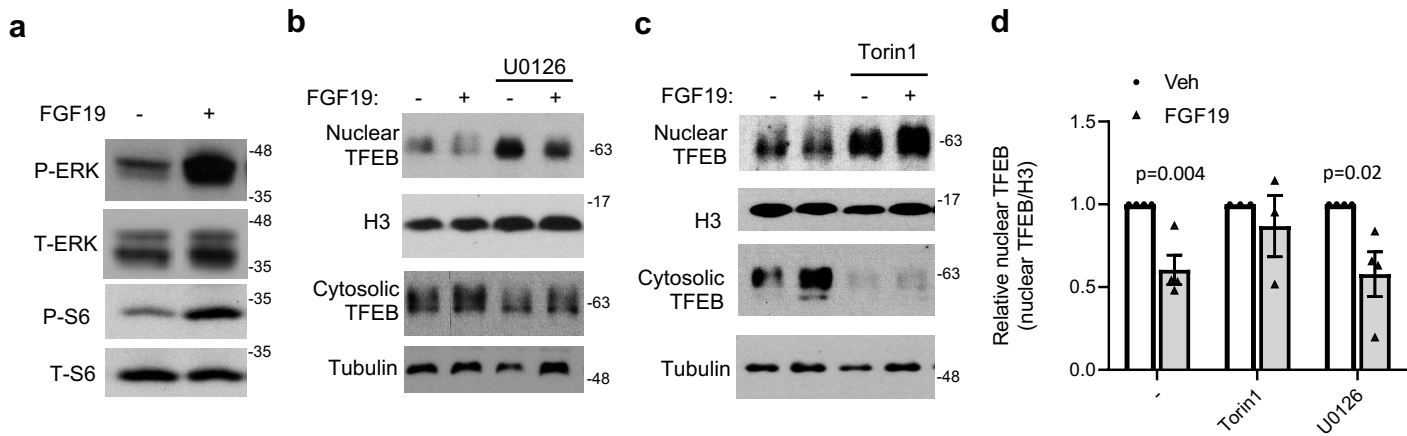

**Supplemental Figure 4. Blocking mTOR signaling abolished the inhibitory effects of FGF19 on TFEB nuclear localization in primary human hepatocytes.** **a.** Primary human hepatocytes were treated with 50 ng/ml FGF19 for 6 h. Total and phosphorylated ERK and S6 were measured. Representative images of 4 independent experiments with similar results. **b-d.** Nuclear and cytosolic TFEB abundance in primary human hepatocytes. Cells were treated with vehicle, 250 nM Torin1 or 10  $\mu$ M U0126 for 30 min followed by 50 ng/ml FGF19 treatment for 6 h. A representative blot is shown in “b” and “c”. Average nuclear TFEB abundance of independent preparations of hepatocytes is shown in “d” (n=4 for Veh and U0126, n=3 for Torin1). Value of the non-FGF19 treated group was arbitrarily set as “1”. Two-sided Student’s t-test was used for “d”. Source data for a-d are provided as a Source Data file.

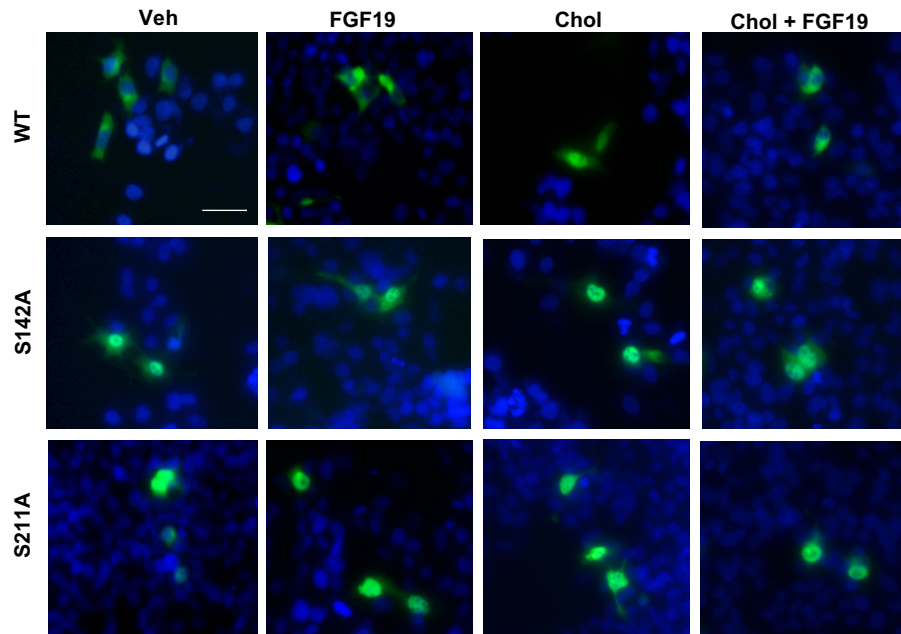

**Supplemental Figure 5. FGF19 inhibition of TFEB nuclear localization requires S211 phosphorylation.** Representative images of quantitative results of 3 independent experiments shown in Fig 4D. Green. FLAG; blue: DAPI. Scale bar: 50  $\mu$ m.

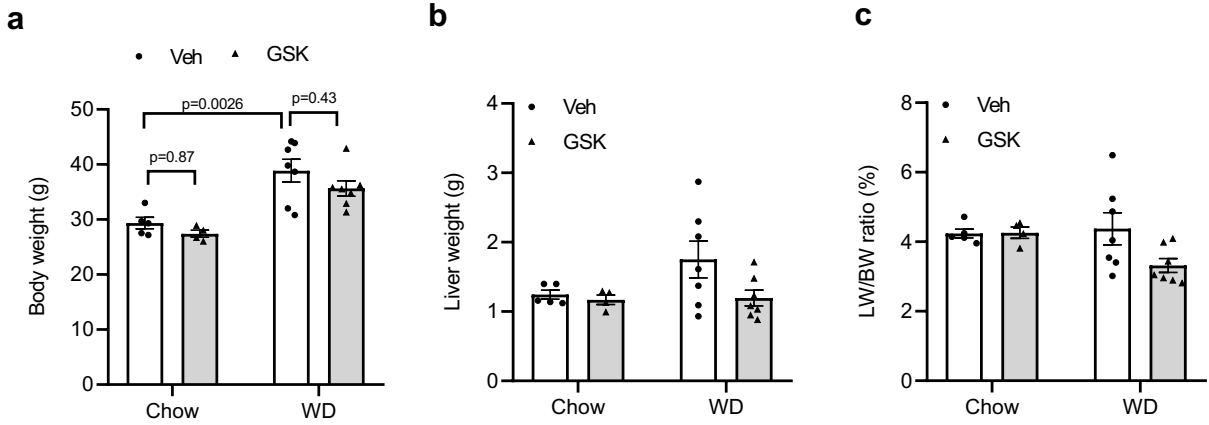

**Supplemental Figure 6. Effect of ASBT inhibitor treatment on liver weight to body weight ratio in mice.** Male 10-week old C57BL/6J mice were fed chow or WD for 10 weeks, and treated with 2 mg/kg GSK or vehicle (veh) daily via oral gavage for 2 weeks. **a.** Body weight. **b.** Liver weight. **c.** Liver weight (LW) to body weight (BW) ratio. n=5 mice/group for Veh+Chow; n=4 mice/group for GSK+Chow; n=7 mice/group for Veh+WD and GSK+WD. Results were expressed as mean  $\pm$  SEM. Two-way ANOVA and Tukey post hoc were used for A-C. Source data for a-c are provided as a Source Data file.

**a**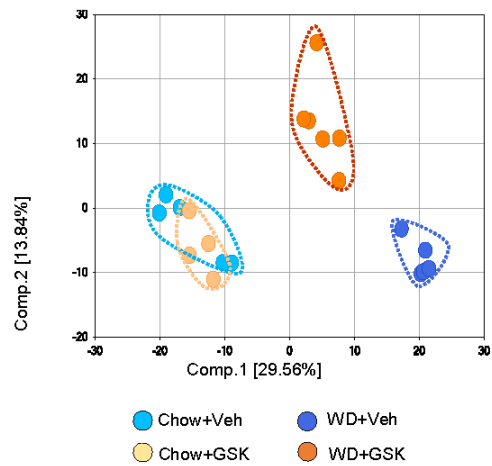**b**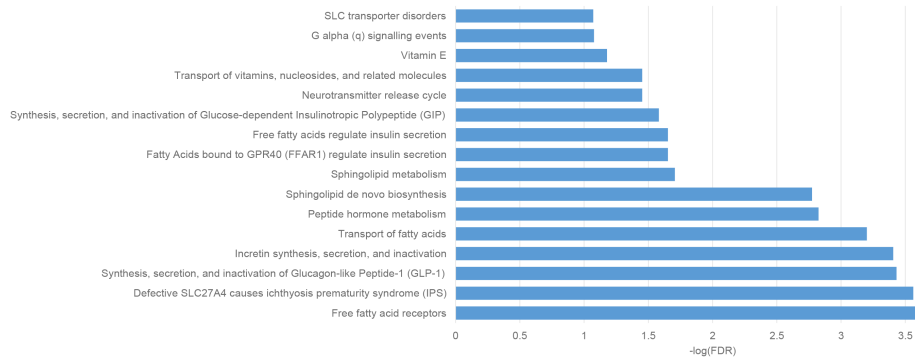**c**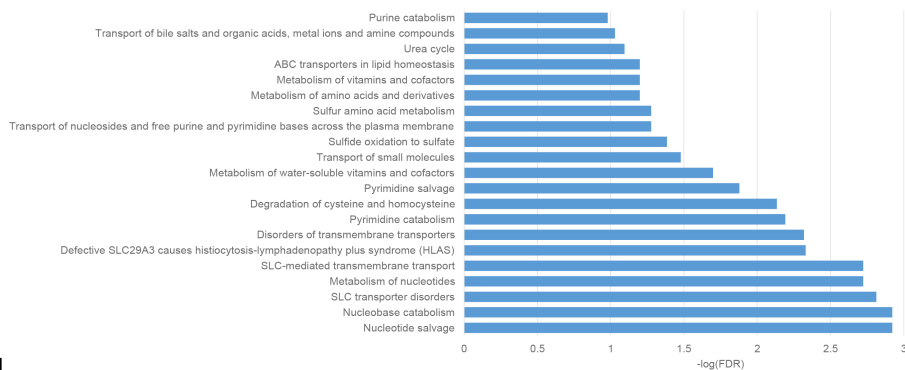**d**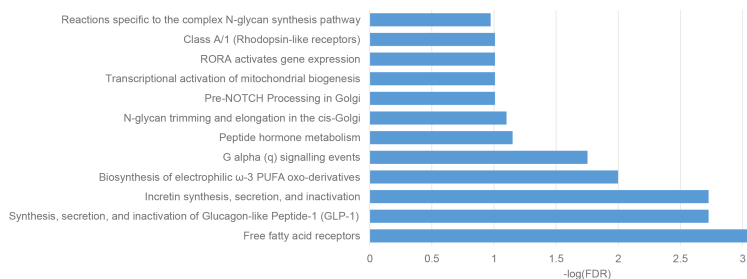

**Supplemental Figure 7. Principle components and pathway analysis of hepatic metabolites in GSK-treated mice.** Male 10-week old C57BL/6J mice were fed either chow or WD for 10 weeks, and then treated with 2 mg/kg GSK or vehicle (veh) via oral gavage for 2 weeks. Liver metabolites were measured by metabolomics. **a.** Principle component analysis. **b.** Top altered pathways in cluster 1. **c.** Top altered pathways in cluster 2. **d.** Top altered pathways in cluster 3. This analysis is relevant to clustering analysis shown in Fig 7e and is described in the “Methods” section.



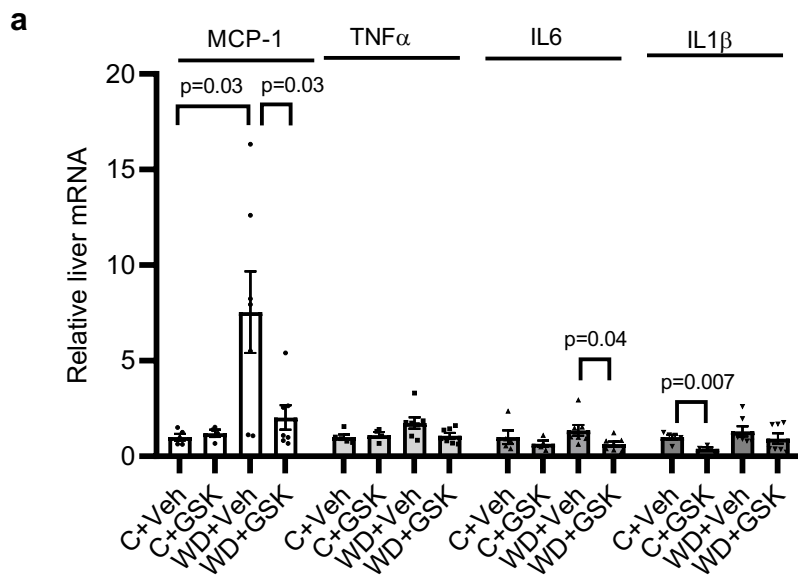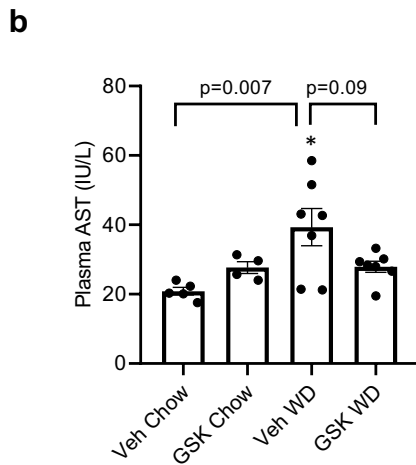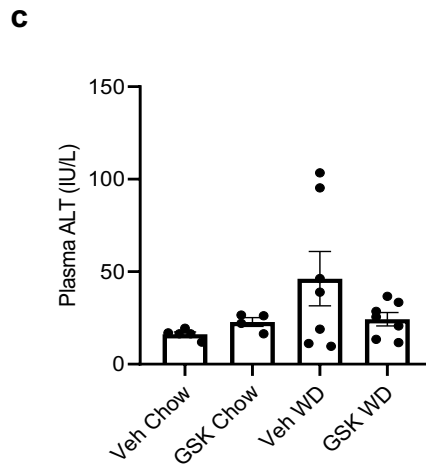

**Supplemental Fig 8. Effects of GSK treatment on hepatic cytokine mRNA expression and plasma transaminases in mice.** **a.** Hepatic mRNA expression of monocyte chemoattractant protein 1 (MCP-1), Tumor necrosis factor  $\alpha$  (TNF $\alpha$ ), interleukin-6 (IL6) and interleukin-1 $\beta$  (IL1 $\beta$ ). **b-c.** Plasma aspartate aminotransferase (AST) and alanine aminotransferase (ALT).  $n=5$  mice/group for Veh+Chow;  $n=4$  mice/group for GSK+Chow;  $n=7$  mice/group for Veh+WD and GSK+WD. Results were expressed as mean  $\pm$  SEM. Two-way ANOVA and Tukey post hoc were used for b. Two-way ANOVA yielded insignificant p values ( $>0.05$ ) for a and c. Two-sided Student's t-test was used to compare GSK effect in "a" and p values  $< 0.05$  were shown. Source data for a-c are provided as a Source Data file.

**a**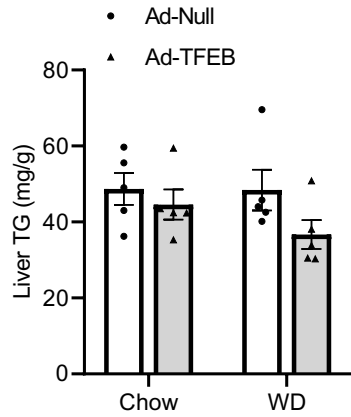**b**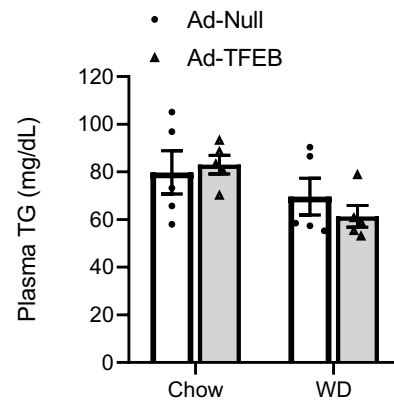

**Supplemental Figure 9. Effects of hepatic TFEB overexpression on hepatic and plasma TG in mice.** Male 10-week old C57BL/6J mice were injected Ad-Null or Ad-TFEB at a dose of  $5 \times 10^8$  pfu/mouse via tail vein. Mice were fed chow diet for one week and then either fed chow or challenged with WD for one additional week. (n=5 mice/group). **a.** Liver TG. **b.** Plasma TG. All results were expressed as mean  $\pm$  SEM. Two-way ANOVA and Tukey post hoc were used. Source data for a-b are provided as a Source Data file.

**a**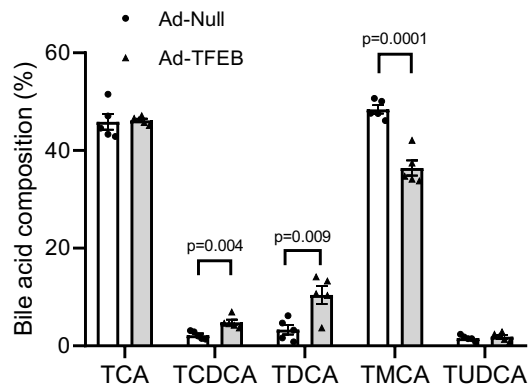**b**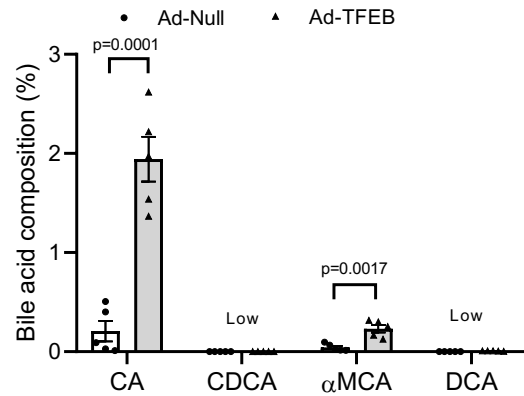**c**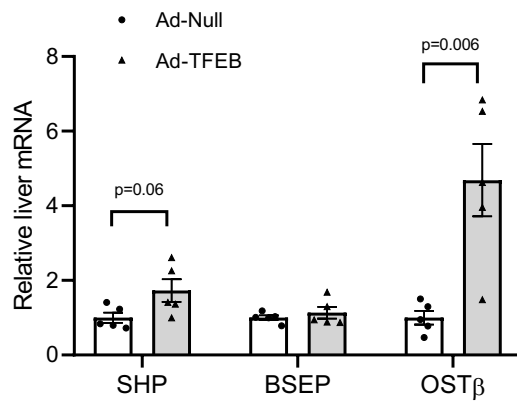

**Supplemental Figure 10. Effect of hepatic TFEB overexpression on bile acid composition in chow-fed mice.** Male 10-week old C57BL/6J mice were injected Ad-Null or Ad-TFEB at a dose of  $5 \times 10^8$  pfu/mouse via tail vein. Mice were fed chow diet for two additional weeks and sacrificed. (n=5 mice/group). **a-b.** Gallbladder bile acid composition was measured with LC-MS method. TMCA is the total of T- $\alpha$ MCA, T- $\beta$ MCA and T- $\omega$ MCA. Low: Less than 0.01% of total bile acid content. **c.** Liver mRNA. All results were expressed as mean  $\pm$  SEM. Two-sided Student's t-test was used for "a-c". Source data for a-c are provided as a Source Data file.

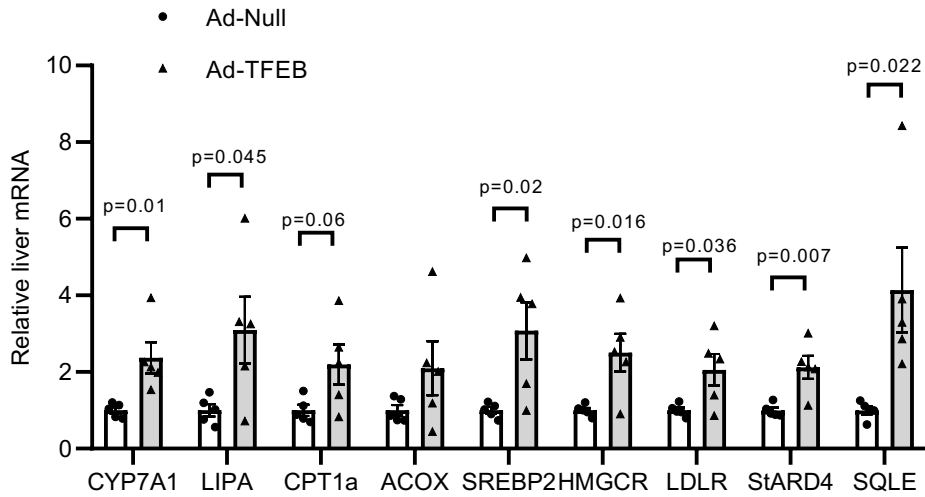

**Supplemental Figure 11. Effects of hepatic TFEB overexpression on hepatic gene expression in WD-fed mice.** Male 10-week old C57BL/6J mice were injected Ad-Null or Ad-TFEB at a dose of  $5 \times 10^8$  pfu/mouse via tail vein. Mice were fed chow diet for one week and then challenged with WD for one additional week. All mRNA expression results were expressed as mean  $\pm$  SEM. (n=5 mice/group). Two-sided Student's t-test was used. Source data are provided as a Source Data file.

Supplemental Table 1. Real-time PCR primer sequences

|                 |   |                           |
|-----------------|---|---------------------------|
| m-CYP7A1        | F | GGGATTGCTGTGGTAGTGAGC     |
|                 | R | GGTATGGAATCAACCCGTTGTC    |
| m-CYP8B1        | F | CCTCTGGACAAGGGTTTTGTG     |
|                 | R | GCACCGTGAAGACATCCCC       |
| M-TFEB          | F | AAGGTTCTGGGAGTATCTGTCTG   |
|                 | R | GGGTTGGAGCTGATATGTAGCA    |
| m-PGC1 $\alpha$ | F | AGACGGATTGCCCTCATTGGA     |
|                 | R | GGTCTTAACAATGGCAGGGTTT    |
| m-CPT1          | F | CTCCGCCTGAGCCATGAAG       |
|                 | R | CACCAGTGATGATGCCATTCT     |
| m-FGF21         | F | CTGCTGGGGGTCTACCAAG       |
|                 | R | CTGCGCCTACCACTGTTCC       |
| m-FGF15         | F | ATGGCGAGAAAGTGGAACGG      |
|                 | R | CTGACACAGACTGGGATTGCT     |
| m-LIPA          | F | TGTTCTGTTTTCAACCATTGGGA   |
|                 | R | CGCATGATTATCTCGGTCACA     |
| m-MCP1          | F | TTAAAAACCTGGATCGGAACCAA   |
|                 | R | GCATTAGCTTCAGATTTACGGGT   |
| m-TNF $\alpha$  | F | CCCTCACACTCAGATCATCTTCT   |
|                 | R | GCTACGACGTGGGCTACAG       |
| m-IL6           | F | TAGTCCTTCTACCCCAATTTCC    |
|                 | R | TTGGTCCTTAGCCACTCCTTC     |
| m-IL1 $\beta$   | F | GCAACTGTTCTGAACTCAACT     |
|                 | R | ATCTTTTGGGGTCCGTCAACT     |
| m-SHP           | F | TGGGTCCCAAGGAGTATGC       |
|                 | R | GCTCCAAGACTTCACACAGTG     |
| m-BSEP          | F | ATGTGACCTTCCATTATCCTTCTCG |
|                 | R | GCTGTAGTGCTGTGCTCTTCC     |
| m-OST $\beta$   | F | AGAAACATCTCAATCAGGAGCAG   |
|                 | R | CTGGTGTTTCTTTGTCTTGTGG    |
| m-ACOX1         | F | TAAGTTCCTCACTCGAAGCCA     |
|                 | R | AGTTCCATGACCCATCTCTGTC    |
| m-SREBP2        | F | GCAGCAACGGGACCATTCT       |
|                 | R | CCCCATGACTAAGTCTTCAACT    |
| m-HMGCR         | F | AGCTTGCCCGAATTGTATGTG     |
|                 | R | TCTGTTGTGAACCATGTGACTTC   |
| m-LDLR          | F | TGACTCAGACGAACAAGGCTG     |
|                 | R | ATCTAGGCAATCTCGGTCTCC     |
| m-StARD4        | F | AGCCCGTGGTCACAGATTG       |
|                 | R | GCAACTCGCCACTCATCTTC      |
| m-SQLE          | F | ATAAGAAATGCGGGGATGTCAC    |
|                 | R | ATATCCGAGAAGGCAGCGAAC     |
| h-CYP7A1        | F | GAGAAGGCAAACGGGTGAAC      |
|                 | R | GGATTGGCACCAAATTGCAGA     |
| h-CYP8B1        | F | CTTGTTCTGGCTACACGAAGGA    |
|                 | R | GCAGGGAGTAGACAAACCTTG     |
| h-PGC1 $\alpha$ | F | TCTGAGTCTGTATGGAGTGACAT   |
|                 | R | CCAAGTCGTTACATCTAGTTCA    |
| 18S             | F | GAGCGAAAGCATTGCGCAAG      |
|                 | R | GGCATCGTTTATGGTCGGAA      |
